# Supplementary material for: Prolonged FOS activity disrupts a global myogenic transcriptional program by altering 3D chromatin architecture in primary muscle progenitor cells
Source: PubMed Central journal article supplement (PMC9377060; doi:10.1186/s13395-022-00303-x), 2022-08-15

# Supplementary Figure S1

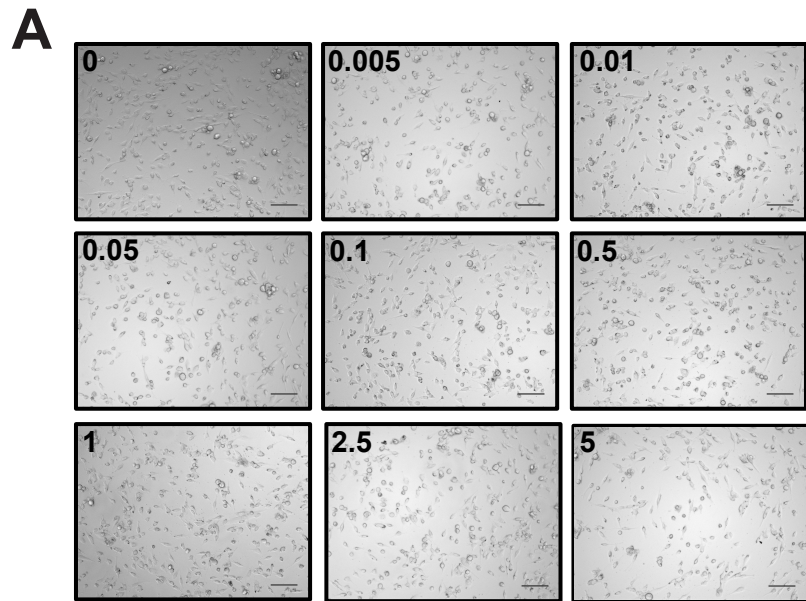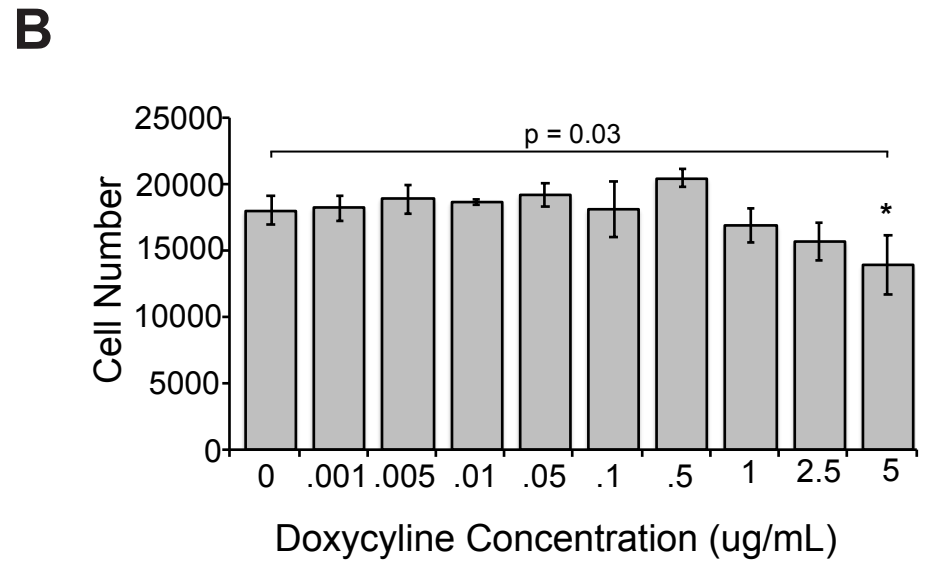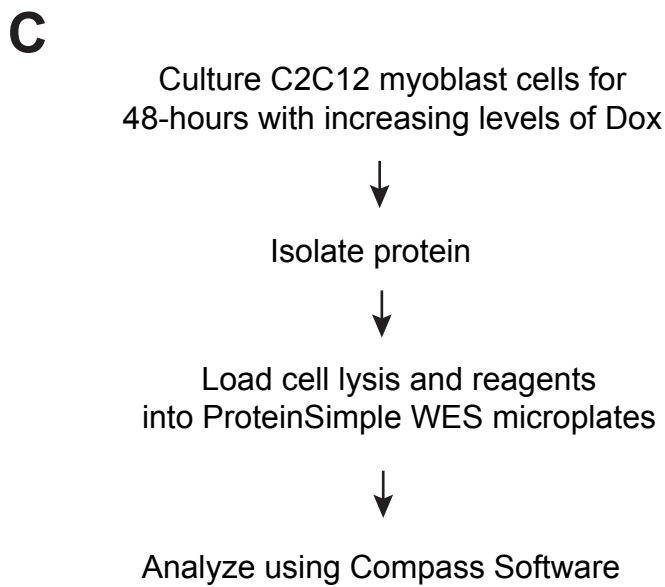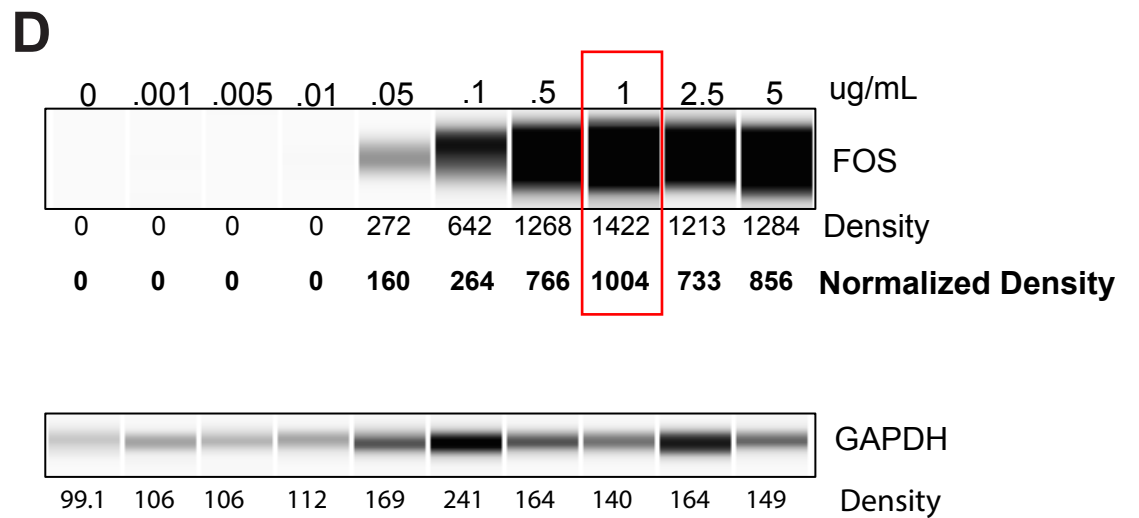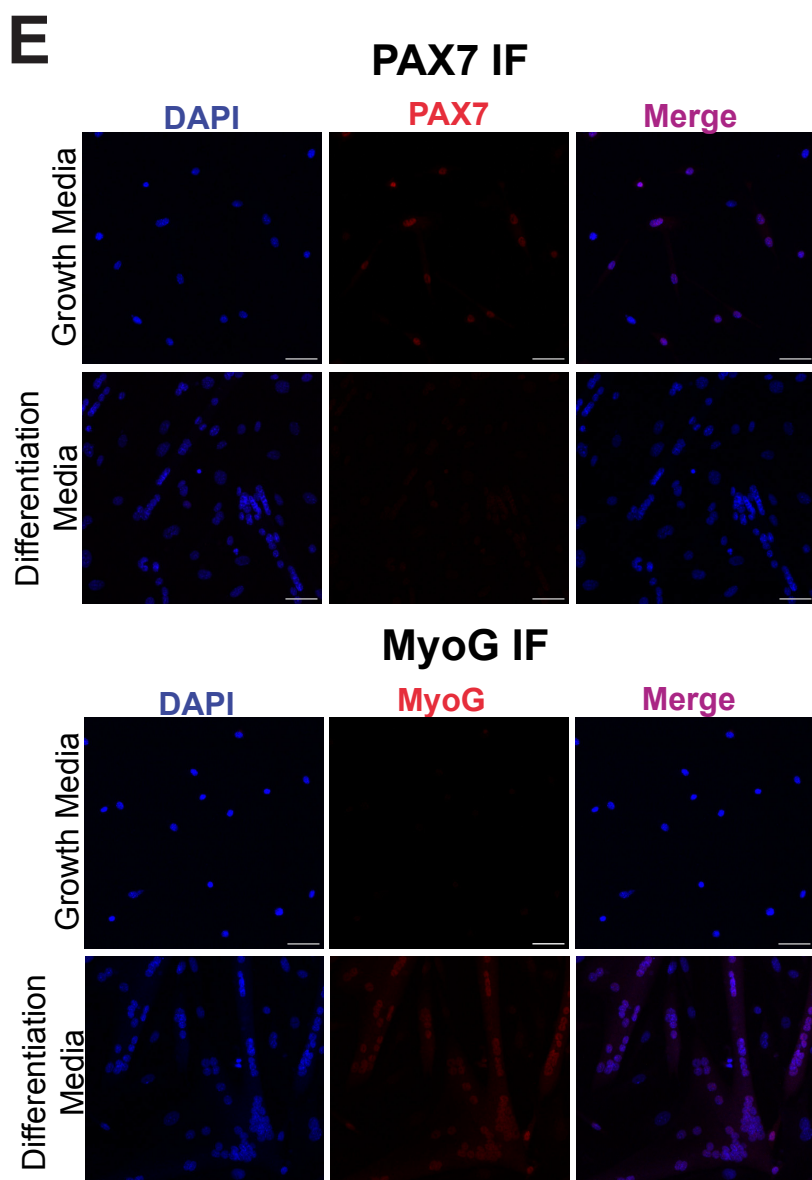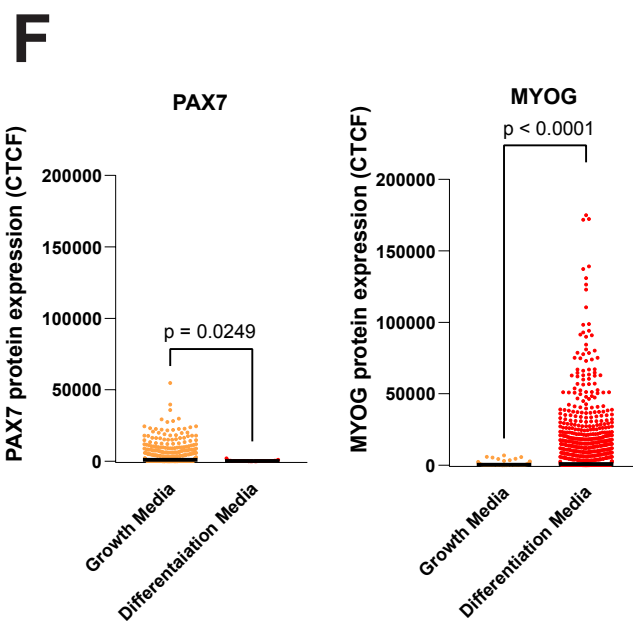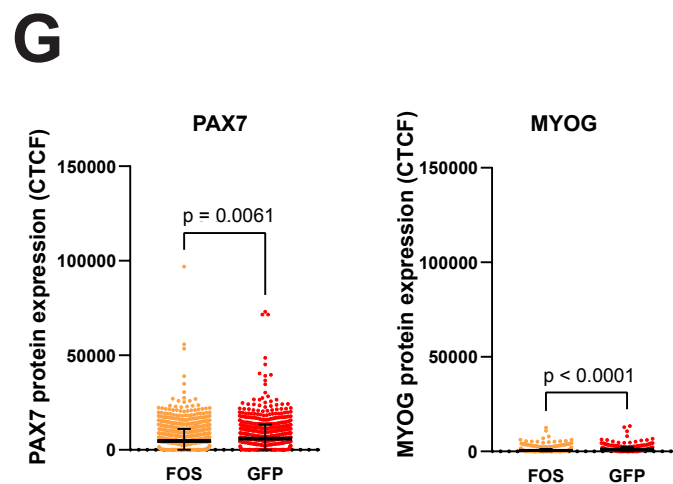

# Supplementary Figure S2

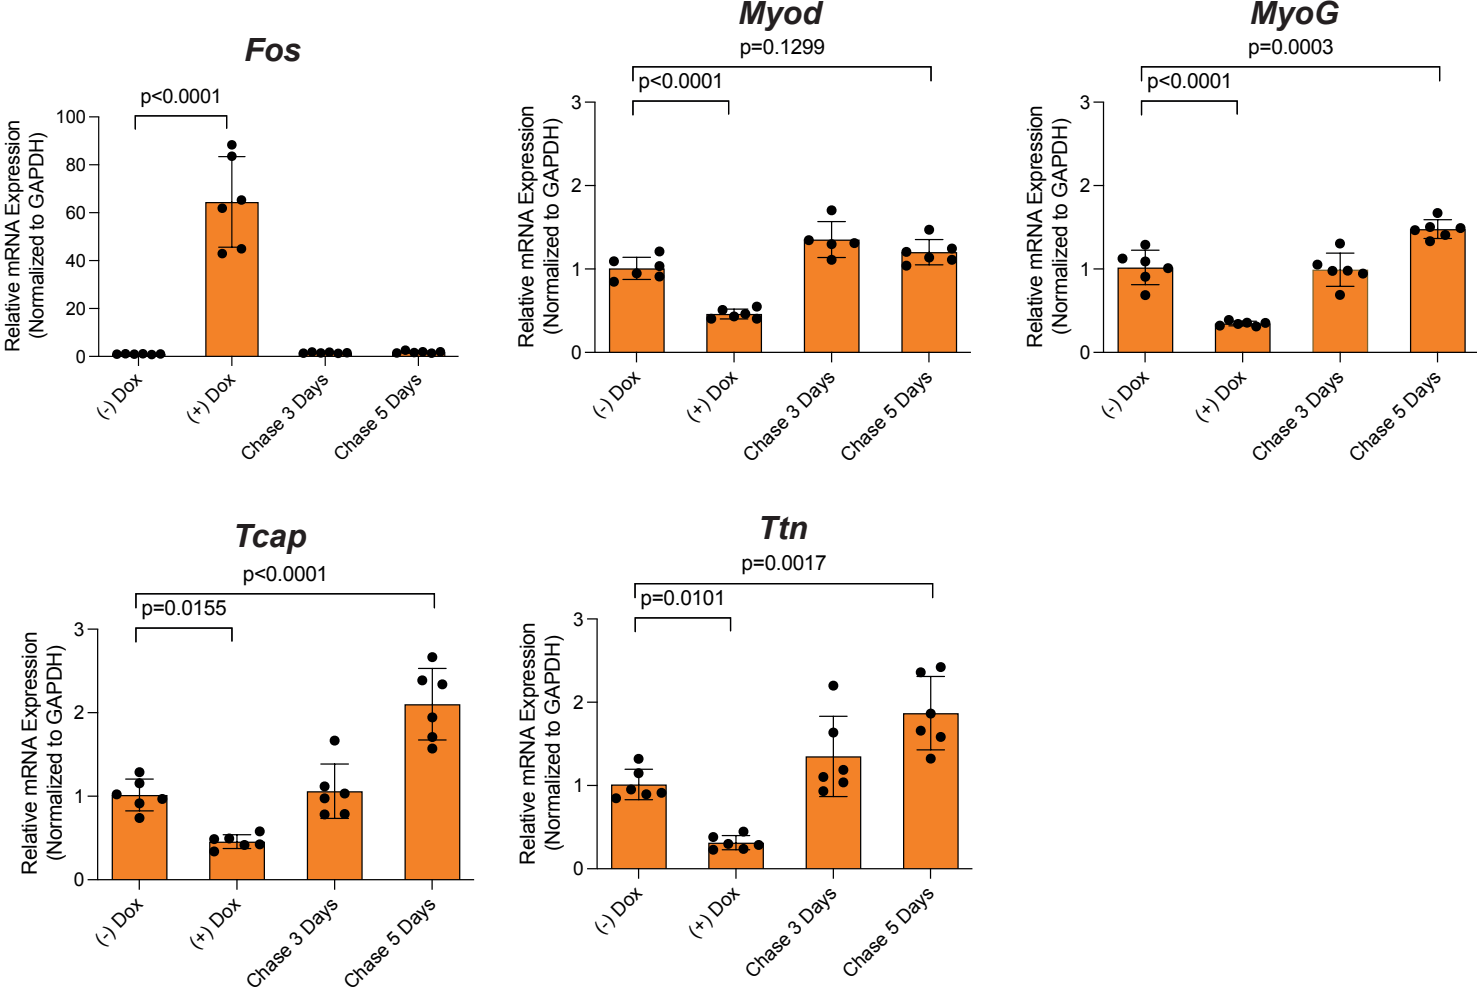



# Supplementary Figure S3

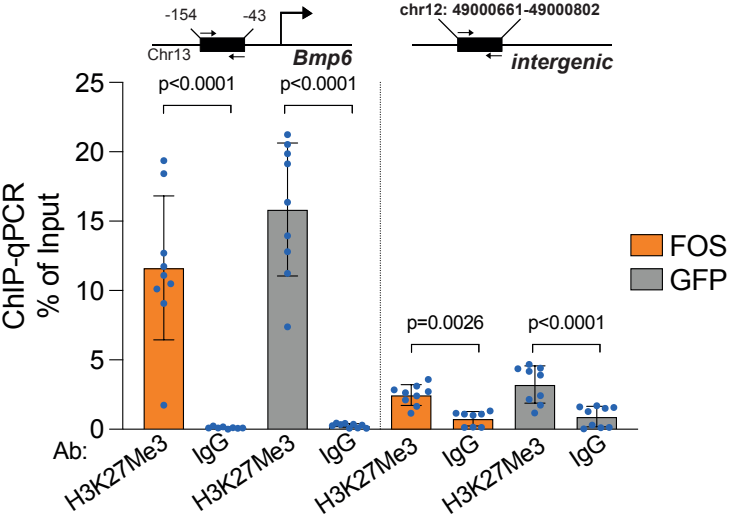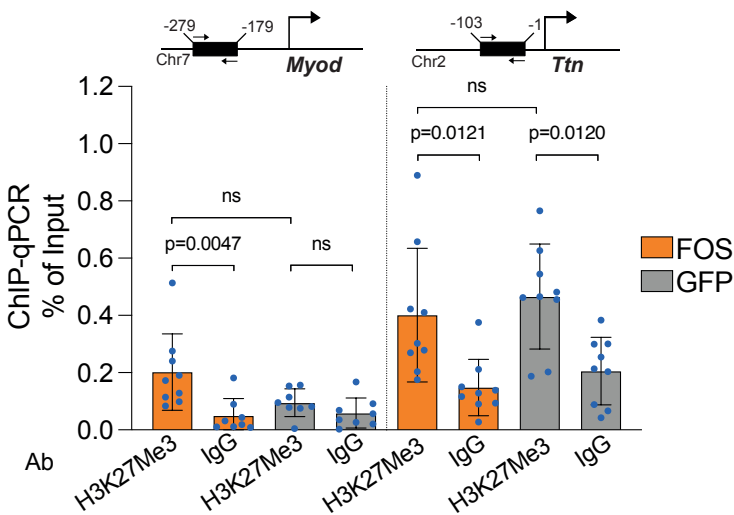

Supplementary Figure S4

A

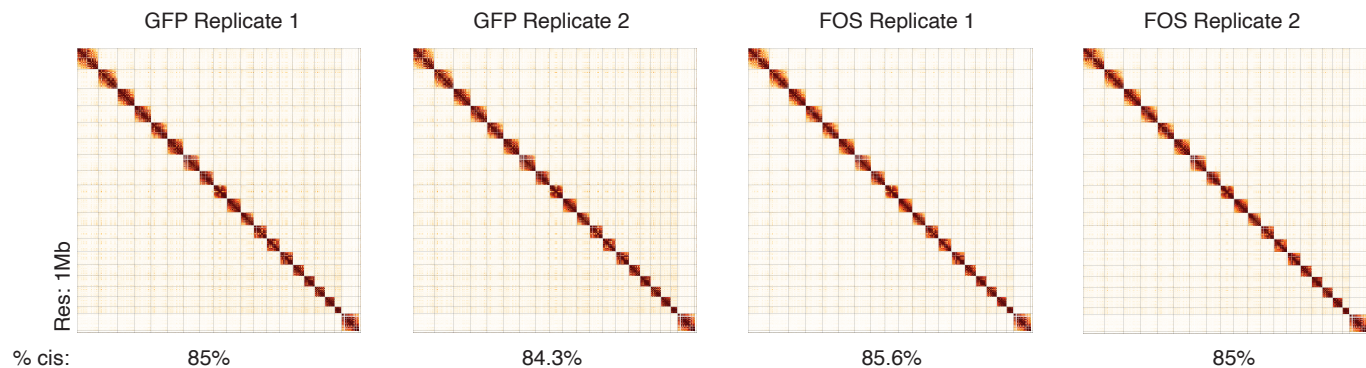

B

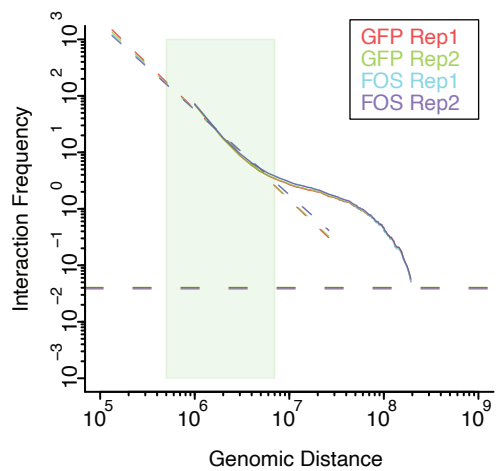

C

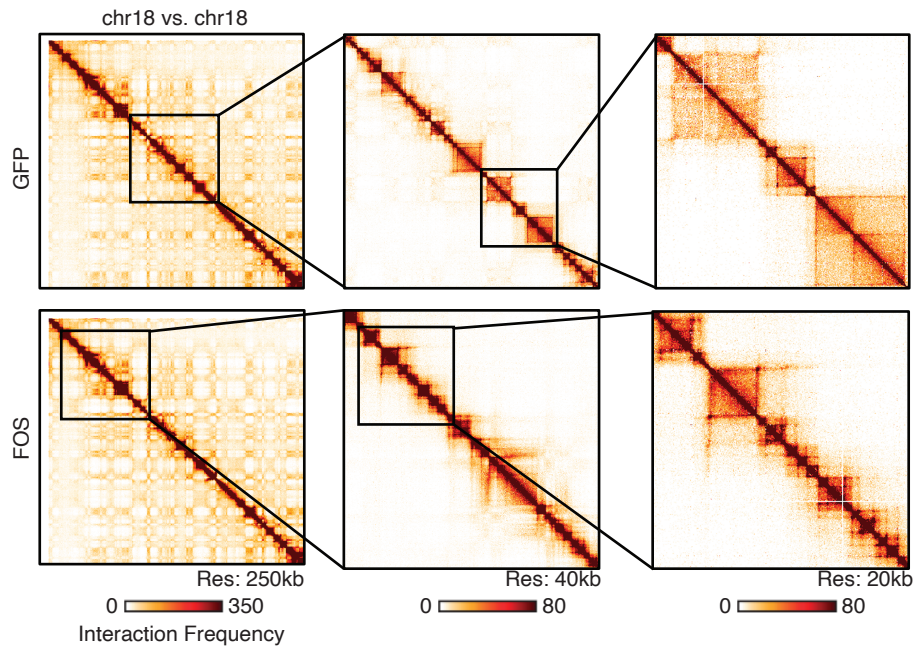

# Supplementary Figure S5

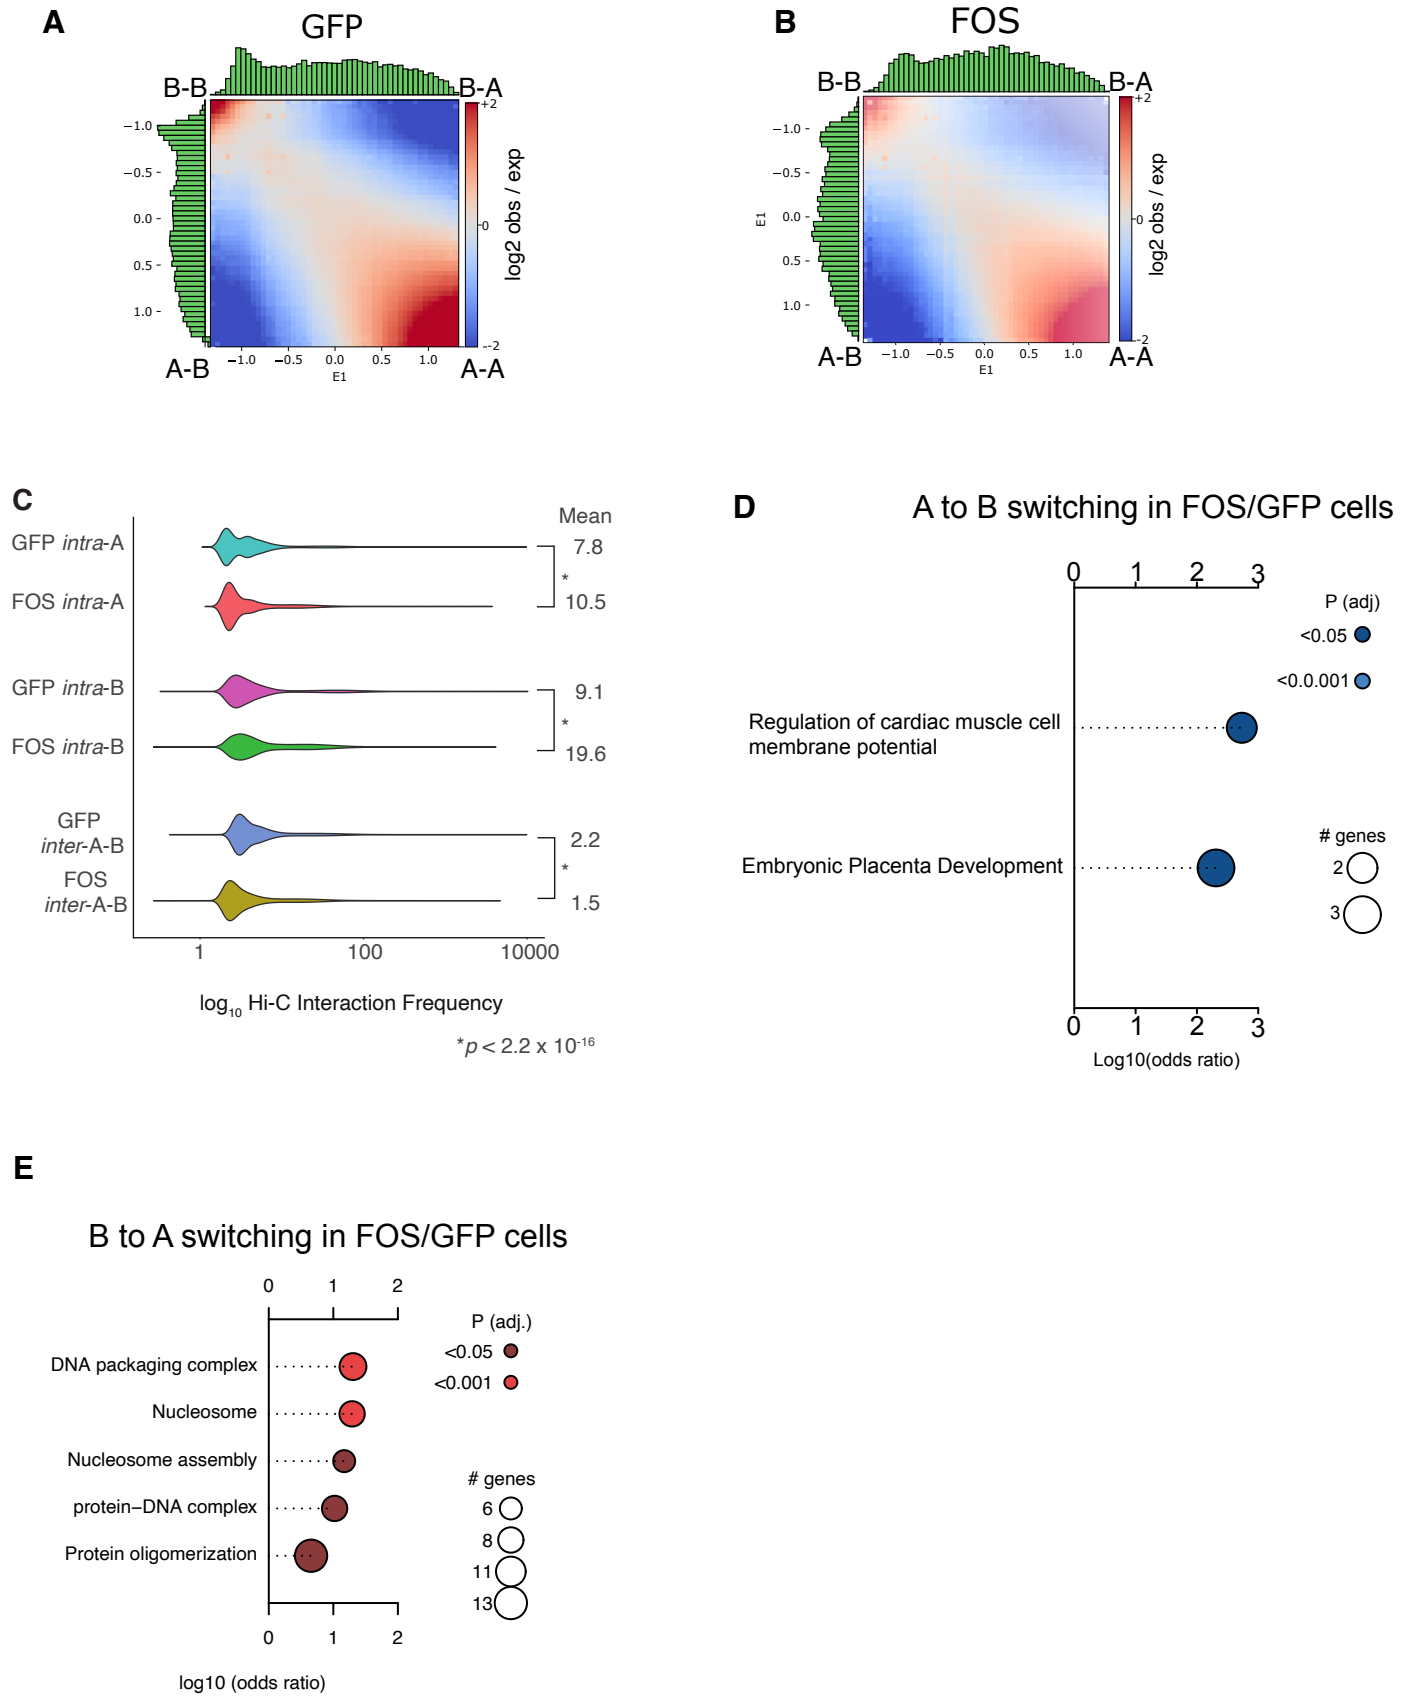

# Supplementary Figure S6

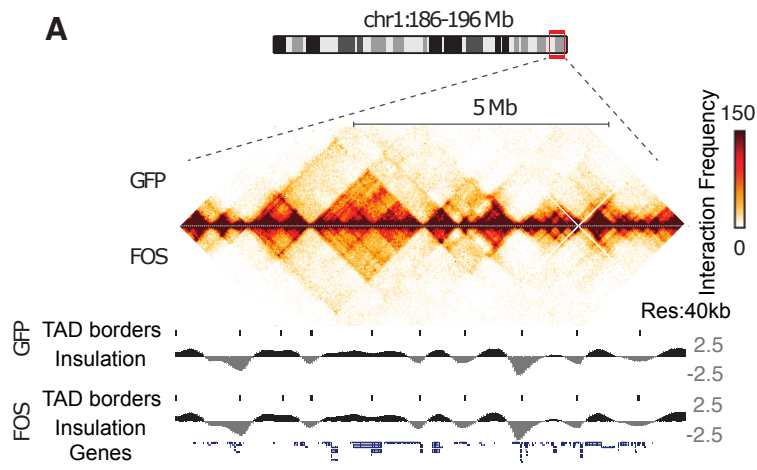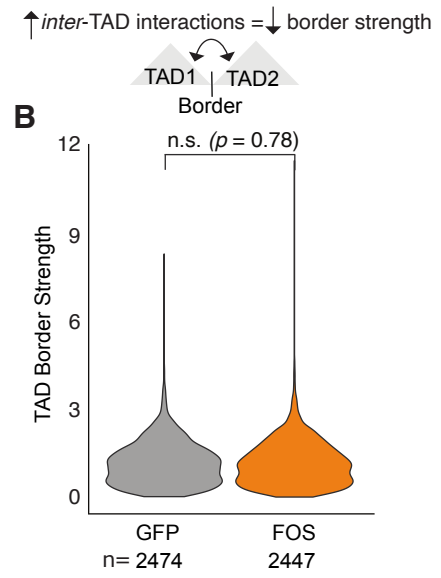

# Supplementary Figure S7

**A**

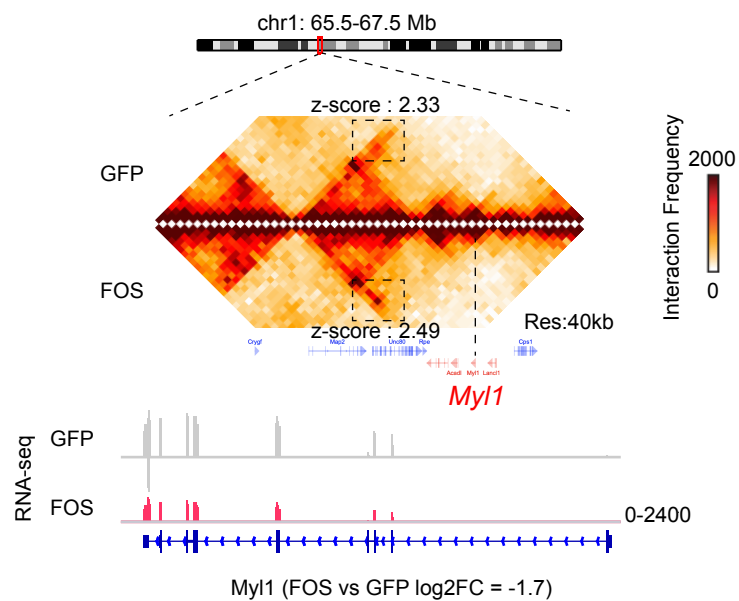

**B**

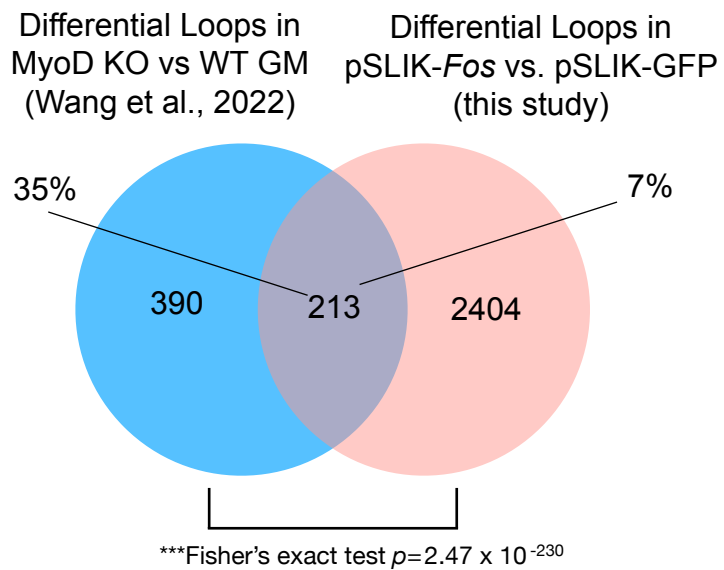

Supplement: 13395_2022_303_MOESM1_ESM.pdf [file 13395_2022_303_MOESM1_ESM.pdf]
